# Supplementary material for: Web-Based STAR E-Learning Course Increases Empathy and Understanding in Dementia Caregivers: Results from a Randomized Controlled Trial in the Netherlands and the United Kingdom
Source: PubMed Central journal article supplement (PMC4642792; doi:10.2196/jmir.4025), 2015-10-30
Supplement: jmir_v17i10e241_app1.pdf [file jmir_v17i10e241_app1.pdf]

**Flowchart STAR participants.**
